# Supplementary material for: Three-dose mRNA-1273 vaccination schedule: sufficient antibody response in majority of immunocompromised hematology patients
Source: bioRxiv or medRxiv preprint supplement (doi:10.1101/2022.04.08.22273602), 2022-04-10
Supplement: Supplementary file [file media-1.pdf]

eTable 1

|                                                 | After 2-dose mRNA-1273 |                  |                  |                                                             | After 3-dose mRNA-1273 |                  |                  |                                                             |
|-------------------------------------------------|------------------------|------------------|------------------|-------------------------------------------------------------|------------------------|------------------|------------------|-------------------------------------------------------------|
|                                                 | n                      | Age<br>mean (SD) | Sex<br>women (%) | B cell (x10 <sup>9</sup> /l) <sup>1</sup><br>median (range) | n                      | Age<br>mean (SD) | Sex<br>women (%) | B cell (x10 <sup>9</sup> /l) <sup>2</sup><br>median (range) |
| <b>All patients</b>                             | 161                    | 60.2 (10)        | 64 (39.8)        | 0.10 (0.0-86.0)                                             | 129                    | 60.1 (10.3)      | 53 (41.1)        | 0.11 (0.00-14.95)                                           |
| <b>Lymphoma</b>                                 |                        |                  |                  |                                                             |                        |                  |                  |                                                             |
| During rituximab +/- chemotherapy               | 2                      | 70 (6)           | 0 (0)            | 0.00 (0.00-0.00)                                            | 1                      | 74 (0)           | 0 (0.0)          | 0.00 (0.00-0.00)                                            |
| < 12 months after rituximab +/- chemotherapy    | 6                      | 60 (15)          | 2 (33.3)         | 0.01 (0.00-0.04)                                            | 4                      | 61 (17)          | 2 (50.0)         | 0.15 (0.00-0.45)                                            |
| < 12 months after autologous HCT (BEAM)         | 7                      | 53 (17)          | 4 (57.1)         | 0.12 (0.00-0.19)                                            | 5                      | 50 (19)          | 4 (80.0)         | 0.22 (0.17-0.23)                                            |
| <b>Multiple myeloma</b>                         |                        |                  |                  |                                                             |                        |                  |                  |                                                             |
| 1st line therapy                                | 7                      | 58 (9)           | 3 (42.9)         | 0.03 (0.01-0.04)                                            | 2                      | 68 (4)           | 1 (50.0)         | 0.04 (0.01-0.08)                                            |
| Daratumumab-containing therapy                  | 28                     | 63 (7)           | 12 (40.0)        | 0.05 (0.00-0.62)                                            | 30                     | 63 (7)           | 12 (40.0)        | 0.04 (0.00-0.33)                                            |
| IMiDs                                           | 15                     | 60 (7)           | 5 (33.3)         | 0.10 (0.00-0.27)                                            | 14                     | 59 (6)           | 5 (35.7)         | 0.09 (0.00-0.25)                                            |
| < 9 months after autologous HCT (HDM)           | 13                     | 62 (7)           | 4 (30.8)         | 0.12 (0.01-86)                                              | 10                     | 61 (7)           | 3 (30.0)         | 0.11 (0.03-0.37)                                            |
| <b>Chronic lymphocytic leukemia</b>             |                        |                  |                  |                                                             |                        |                  |                  |                                                             |
| Wait & see                                      | 14                     | 63 (9)           | 6 (42.9)         | 8.31 (1.10-75.01)                                           | 12                     | 62 (9)           | 5 (41.6)         | 7.50 (1.25-14.96)                                           |
| Ibrutinib                                       | 4                      | 58 (6)           | 2 (50.0)         | 2.08 (0.02-56.10)                                           | 1                      | 54 (0)           | 1 (100.0)        | na                                                          |
| <b>Chronic myeloid leukemia</b>                 |                        |                  |                  |                                                             |                        |                  |                  |                                                             |
| Tyrosine kinase inhibitors                      | 12                     | 52 (10)          | 5 (41.7)         | 0.23 (0.14-0.50)                                            | 10                     | 52 (10)          | 3 (30.0)         | 0.17 (0.08-0.23)                                            |
| <b>Acute myeloid leukemia and high-risk MDS</b> |                        |                  |                  |                                                             |                        |                  |                  |                                                             |
| Hypomethylating therapy                         | 5                      | 59 (22)          | 1 (20.0)         | 0.04 (0.00-0.10)                                            | 3                      | 52 (29)          | 1 (33.3)         | 0.05 (0.00-0.07)                                            |
| High-dose chemotherapy                          | 5                      | 64 (2)           | 3 (60.0)         | 0.06 (0.01-0.24)                                            | 4                      | 64 (2)           | 3 (75.0)         | 0.18 (0.06-0.28)                                            |
| <b>Myeloproliferative disease</b>               |                        |                  |                  |                                                             |                        |                  |                  |                                                             |
| Ruxolitinib                                     | 17                     | 59 (8)           | 9 (52.9)         | 0.17 (0.05-0.59)                                            | 12                     | 58 (11)          | 5 (41.6)         | 0.11 (0.07-0.30)                                            |
| <b>Allogeneic HCT</b>                           |                        |                  |                  |                                                             |                        |                  |                  |                                                             |
| < 6 months after HCT                            | 12                     | 61 (11)          | 5 (41.7)         | 0.01 (0.00-0.28)                                            | 9                      | 65 (6)           | 5 (55.5)         | 0.19 (0.07-0.49)                                            |
| Chronic GvHD                                    | 13                     | 61 (10)          | 3 (23.1)         | 0.11 (0.00-1.09)                                            | 12                     | 60 (10)          | 3 (25.0)         | 0.14 (0.00-0.81)                                            |
| <b>CAR T cell therapy</b>                       |                        |                  |                  |                                                             |                        |                  |                  |                                                             |
| CD19-directed                                   | 1                      | 72               | 0 (0)            | 0.00 (0.00-0.00)                                            | 0                      | na               | na               | na                                                          |

**Supplemental Table 1: Baseline characteristics of patients included in pseudovirus neutralisation analysis.** These were all patients with S1 IgG 50-300 BAU/ML and a random selection of patients with S1 IgG ≥300 BAU/ml after the standard 2-dose mRNA-1273 schedule (Haggenburg et al, Blood Advances 2022). <sup>1</sup>Absolute B cell number at time of inclusion; <sup>2</sup>absolute B cell number at time of 3rd vaccination. Na: not applicable.

eTable 2

|                                                 | N   | %     | IgG S1 after 2 <sup>nd</sup> vaccination (BAU/ml) |                        |         |
|-------------------------------------------------|-----|-------|---------------------------------------------------|------------------------|---------|
|                                                 |     |       | median                                            | 25th - 75th percentile |         |
| <b>All patients</b>                             | 104 | 15.1  | 2323.0                                            | 529.1                  | 5133.5  |
| <b>Lymphoma</b>                                 |     |       |                                                   |                        |         |
| During R-chemo                                  | 3   | 7.0   | 0.1                                               | 0.1                    |         |
| <12 months after R-chemo                        | 3   | 7.7   | 10539.1                                           | 2812.7                 |         |
| <12 months after autologous HCT (BEAM)          | 3   | 10.7  | 7012.2                                            | 68.1                   |         |
| <b>Multiple myeloma</b>                         |     |       |                                                   |                        |         |
| 1st line therapy                                | 2   | 8.0   | 38.1                                              | 20.5                   |         |
| Daratumumab-containing therapy                  | 4   | 8.3   | 1310.3                                            | 291.2                  | 2481.5  |
| IMiDs                                           | 8   | 14.8  | 1129.0                                            | 357.3                  | 16229.4 |
| <9 months after autologous HCT (HDM)            | 4   | 8.3   | 3278.0                                            | 1942.2                 | 3402.5  |
| <b>Chronic lymphocytic leukemia</b>             |     |       |                                                   |                        |         |
| Wait & see                                      | 11  | 20.4  | 2934.1                                            | 307.4                  | 9315.9  |
| Ibrutinib                                       | 3   | 8.3   | 748.6                                             | 319.7                  |         |
| <b>Sickle cell disease</b>                      |     |       |                                                   |                        |         |
| Hydrea containing therapy                       | 31  | 100.0 | 2920.8                                            | 1760.8                 | 5567.8  |
| <b>Chronic Myeloid leukemia</b>                 |     |       |                                                   |                        |         |
| Tyrosine kinase inhibitors                      | 10  | 19.2  | 2252.5                                            | 1447.5                 | 3654.2  |
| <b>Acute myeloid leukemia and high-risk MDS</b> |     |       |                                                   |                        |         |
| Hypomethylating therapy                         | 0   | 0.0   |                                                   |                        |         |
| High-dose chemotherapie                         | 3   | 14.3  | 2842.2                                            | 1101.2                 |         |
| <b>Myeloproliferative disease</b>               |     |       |                                                   |                        |         |
| Ruxolitinib                                     | 6   | 16.2  | 1909.4                                            | 614.2                  | 5084.5  |
| <b>Allogenic SCT</b>                            |     |       |                                                   |                        |         |
| < 6 months after HCT                            | 1   | 2.0   | 175.8                                             | 175.8                  | 175.8   |
| Chronic GvHD                                    | 5   | 8.9   | 8964.6                                            | 3149.3                 | 17534.5 |
| <b>CAR T cell therapy</b>                       |     |       |                                                   |                        |         |
| CD19-directed                                   | 7   | 14.0  | 0.1                                               | 0.1                    | 529.1   |

**Supplemental Table 2: Patients who did not receive a 3<sup>rd</sup> vaccination.** From the n=723 patients included in the cohort (Haggenburg et al, Blood Adv 2022), n=104 patients did not receive a 3<sup>rd</sup> vaccination. Only patients with hematologic malignancies were prioritized per Dutch COVID-19 vaccination protocol, and sickle cell disease patients (n=31) did not receive a 3<sup>rd</sup> vaccination within the timeframe of current analyses. The other patients (n=71) deferred the 3<sup>rd</sup> vaccination for personal reasons, most often because they felt they were sufficiently protected or they thought a 3<sup>rd</sup> vaccination would not be effective anyway. N: number of patients that did not receive a 3<sup>rd</sup> vaccination during the time under study.

eTable 3

|                                      | SARS-CoV-2 infection |                  |
|--------------------------------------|----------------------|------------------|
|                                      | Baseline, n (%)      | Follow up, n (%) |
| <b>All patients</b>                  | 24 (4.2)             | 22 (2.0)         |
| <b>Lymphoma</b>                      |                      |                  |
| During rituximab ± chemotherapy      | 1 (2.6)              | 1 (2.5)          |
| <12mo after rituximab ± chemotherapy | 0                    | 1 (2.8)          |
| <12mo after autologous HCT (BEAM)    | 0                    | 0                |
| <b>Multiple myeloma</b>              |                      |                  |
| 1 <sup>st</sup> line therapy         | 1 (4.3)              | 2 (4.3)          |
| Daratumumab                          | 1 (2.3)              | 2 (2.3)          |
| IMiDs                                | 5 (10.9)             | 2 (2.2)          |
| <9mo after autologous HCT (HDM)      | 5 (11.4)             | 1 (2.3)          |
| <b>CLL</b>                           |                      |                  |
| Watch & wait                         | 0                    | 3 (2.3)          |
| Ibrutinib                            | 2 (6.1)              | 1 (3.0)          |
| <b>CML</b>                           |                      |                  |
| Tyrosine kinase inhibitor            | 2 (4.8)              | 4 (2.4)          |
| <b>AML and high-risk MDS</b>         |                      |                  |
| Hypomethylating therapy              | 0                    | 0                |
| High-dose chemotherapy               | 0                    | 0                |
| <b>Myeloproliferative disease</b>    |                      |                  |
| Ruxolitinib                          | 2 (6.5)              | 0                |
| <b>Allogeneic HCT</b>                |                      |                  |
| < 6 mo after HCT                     | 1 (2.1)              | 2 (2.0)          |
| Chronic GvHD                         | 2 (4.3)              | 2 (2.0)          |

**Supplemental Table 3. SARS-CoV-2-infected patients.** Indicated are patients who had been SARS-CoV-2 infected prior to vaccination ('baseline') or became infected during follow up. Prior SARS-CoV-2 infection is defined as obtaining N IgG >14.3 BAU/ml at baseline or at any time during follow up. Mo: months.

CD19-directed

2 (4.8)

1 (2.3)

eTable 4

A

|                                   | All | IgG S1 after 2 <sup>nd</sup> vaccination (BAU/ml) |        |                        | Time (days) <sup>1</sup> | IgG S1 after 3 <sup>rd</sup> vaccination (BAU/ml) |        |                        | p-value                            |         |      |
|-----------------------------------|-----|---------------------------------------------------|--------|------------------------|--------------------------|---------------------------------------------------|--------|------------------------|------------------------------------|---------|------|
|                                   | N   | N                                                 | median | 25th - 75th percentile | Median (range)           | N                                                 | median | 25th - 75th percentile | 3 <sup>rd</sup> vs 2 <sup>nd</sup> |         |      |
| <b>All patients</b>               | 27  | 25                                                | 443.1  | 31.4                   | 3872.6                   | 88 (1-140)                                        | 26     | 540.8                  | 60.0                               | 8819.0  | 0.19 |
| <b>Autologous HCT</b>             |     |                                                   |        |                        |                          |                                                   |        |                        |                                    |         |      |
| BEAM                              | 2   | 2                                                 | 0.1    | 0.1                    |                          | 33 (1-64)                                         | 2      | 59.5                   | 1.4                                |         | 0.18 |
| HDM                               | 14  | 13                                                | 562.6  | 130.8                  | 3872.6                   | 102 (30-140)                                      | 13     | 8498.5                 | 1315.4                             | 12576.3 | 0.02 |
| Bu/Cy                             | 1   | 1                                                 | 139.5  | 139.5                  | 139.5                    | 103                                               | 1      | 11767.1                | 11767.1                            | 11767.1 | -    |
| <b>Allogeneic HCT<sup>2</sup></b> | 7   | 6                                                 | 832.4  | 144.0                  | 6379.8                   | 65 (41-106)                                       | 7      | 73.5                   | 49.0                               | 109.2   | 0.05 |
| <b>CAR T cell therapy</b>         | 3   | 3                                                 | 0.1    | 0.1                    |                          | 92 (43-119)                                       | 3      | 0.3                    | 0.1                                |         | 0.65 |

B

|                                                 | N  | %    | Autologous HCT | Allogeneic HCT | CAR T cell |
|-------------------------------------------------|----|------|----------------|----------------|------------|
| <b>All patients</b>                             | 27 | 4.6  | 17             | 7              | 3          |
| <b>Lymphoma</b>                                 |    |      |                |                |            |
| During R-chemo                                  | 3  | 7.5  | 1              | -              | 2          |
| <12 months after R-chemo                        | 1  | 2.8  | 1              | -              | -          |
| <12 months after autologous HCT (BEAM)          | 1  | 4.0  | -              | -              | 1          |
| <b>Multiple myeloma</b>                         |    |      |                |                |            |
| 1st line therapy                                | 14 | 60.9 | 14             | -              | -          |
| <b>Chronic lymphocytic leukemia</b>             |    |      |                |                |            |
| Ibrutinib                                       | 1  | 3.0  | -              | 1              | -          |
| <b>Acute myeloid leukemia and high-risk MDS</b> |    |      |                |                |            |
| Hypomethylating therapy                         | 3  | 18.8 | -              | 3              | -          |
| High-dose chemotherapie                         | 4  | 22.2 | 1              | 3              | -          |

**Supplemental Table 4: Characteristics of patients who received cell therapy after the 2<sup>nd</sup> mRNA-1273 vaccination.** **A.** Types of cell therapy received. <sup>1</sup>Time between cell therapy and 3<sup>rd</sup> vaccination. <sup>2</sup>All allogeneic HCT recipients received lymphocyte replete transplants with a haplo-identical donor (n=3; 2 unvaccinated donors, 1 vaccinated), matched unrelated donor (n=3; vaccination status unknown) or cord blood donor (n=1). Six had GvHD prophylaxis (n=2) or GvHD therapy (n=4) at the time of 3<sup>rd</sup> vaccination, which consisted of a calcineurin inhibitor or sirolimus, mycophenolic acid and/or prednisolone. BEAM: carmustine, etoposide, cytarabine, melphalan; HDM: high dose melphalan; Bu/Cy; busulphan cyclophosphamide. **B.** Cohorts of which intercurrent cell therapy patients were from.
