# Supplementary material for: Three-dose mRNA-1273 vaccination schedule: sufficient antibody response in majority of immunocompromised hematology patients
Source: bioRxiv or medRxiv preprint supplement (doi:10.1101/2022.04.08.22273602), 2022-04-10
Supplement: Supplementary file [file media-2.pdf]

## eFigure 1

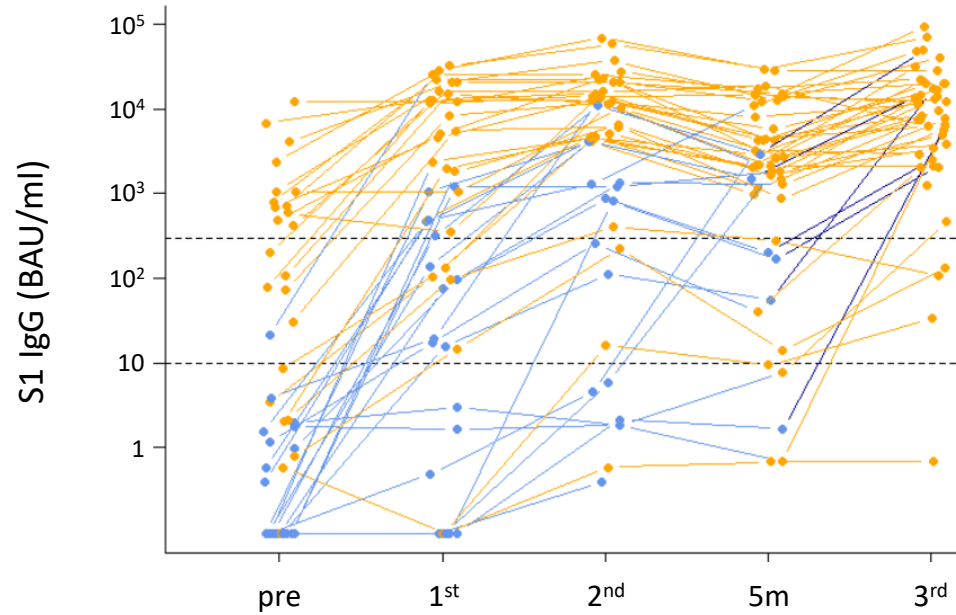

**Supplemental Figure 1. S1 IgG concentration in COVID-19 infected participants.** IgG S1 concentration at each timepoint for patients who were infected with SARS-CoV-2 before the first vaccination or at any time during follow up. Dotted lines indicate seroconversion (S1 IgG >10 BAU/mL) and adequate S1 IgG concentration ( $\geq 300$  BAU/mL). SARS-CoV-2 infection is defined as N IgG  $\geq 14.3$  BAU/mL at baseline or any time during follow up. Blue: N <14.3 BAU/ml at that timepoint; orange: N IgG  $\geq 14.3$  BAU/mL indicating SARS-CoV-2 infection at anytime before that timepoint.

## eFigure 2

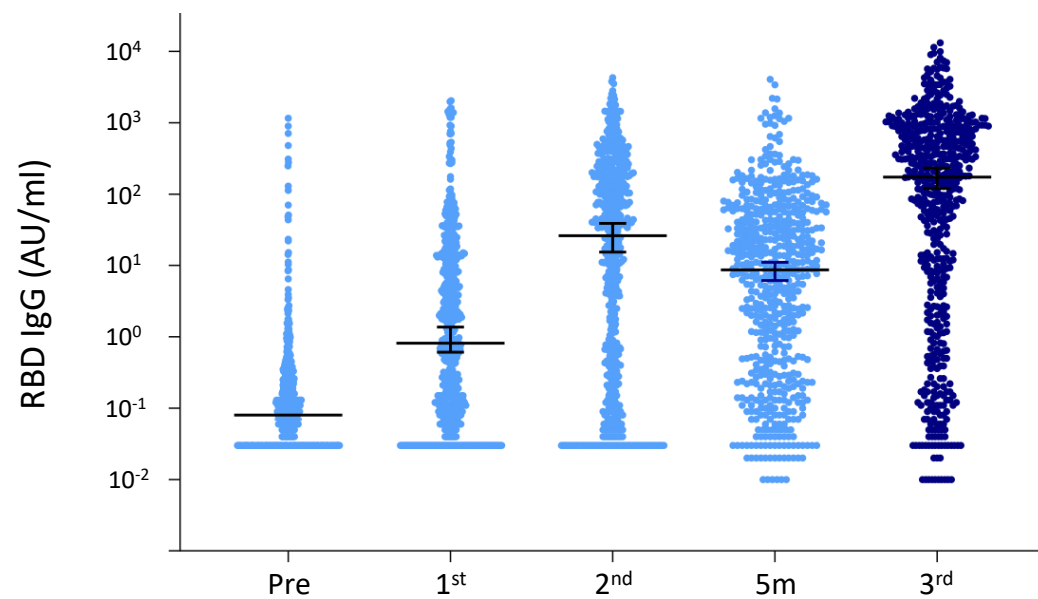

**Supplemental Figure 2. RBD binding antibody concentration.** IgG RBD concentration in AU/mL at each timepoint for previously uninfected patients (light and dark blue).
